# Supplementary material
Source: PubMed Central journal article supplement (PMC2680293)

Type of file: figure

Label: supp fig 1

Filename: Supp\_Fig1.gif

**Step 1:** High frequency components removed with frequency filter

**Step 2:** Remaining low frequency components scored on goodness-of-fit to standard template of executive-control network

Component 1

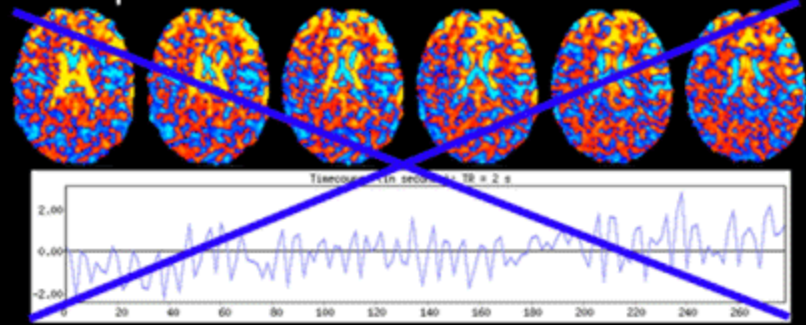

Component 2

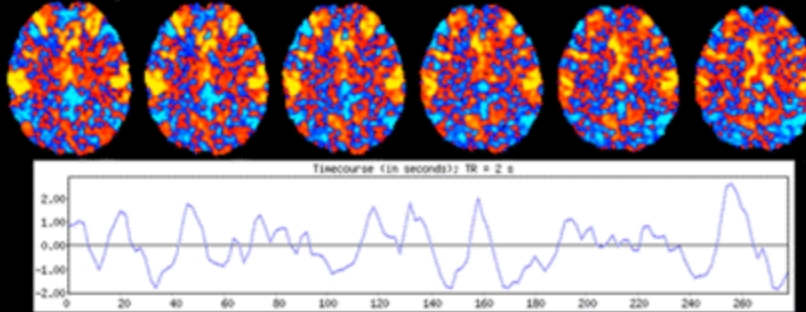

Component 3

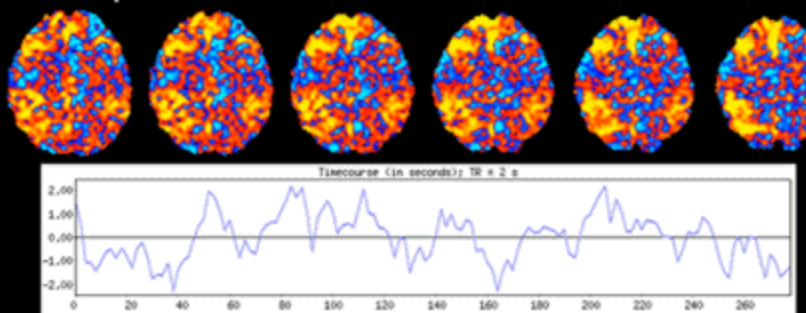

Component 2

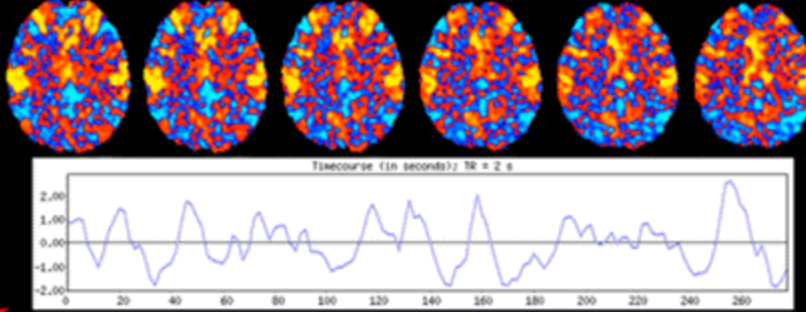

Component 3

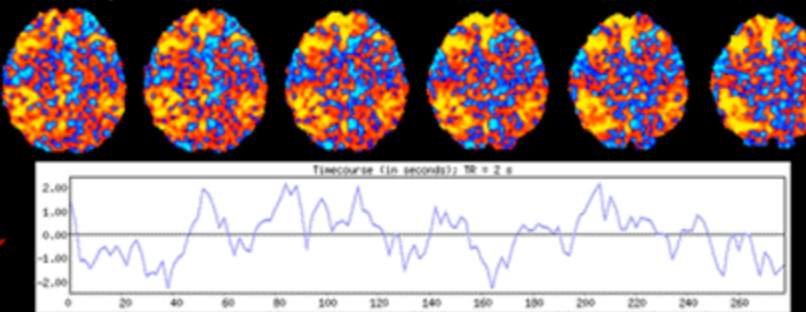

Component 3

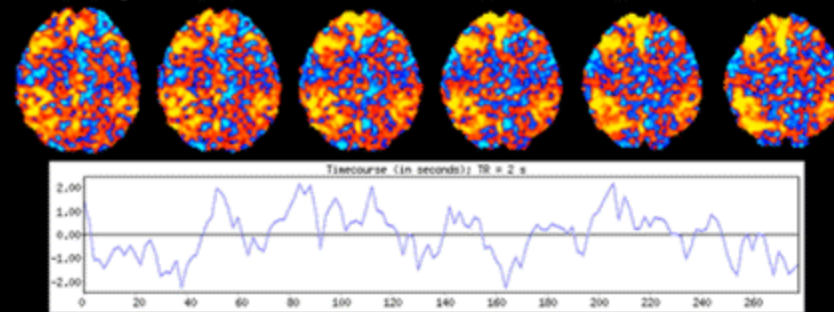

**Step 3:** Component with highest goodness-of-fit score selected as executive-control component for use in group analyses

Type of file: figure

Label: supp fig 2

Filename: Supp\_Fig2.gif

ROI

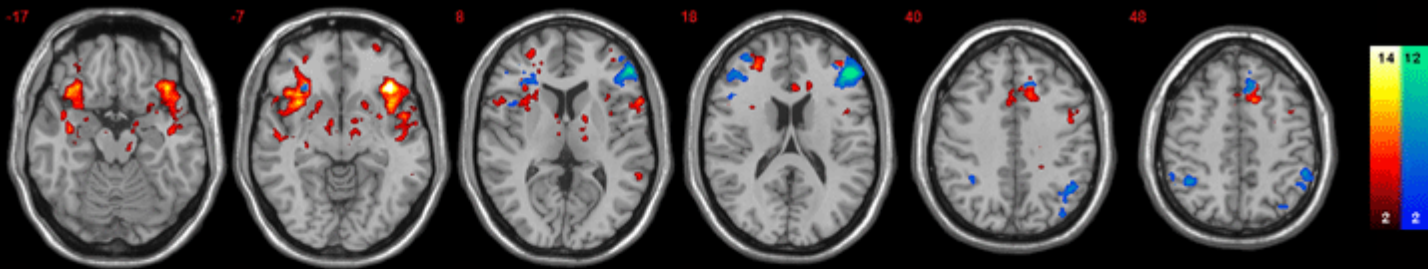

ICA

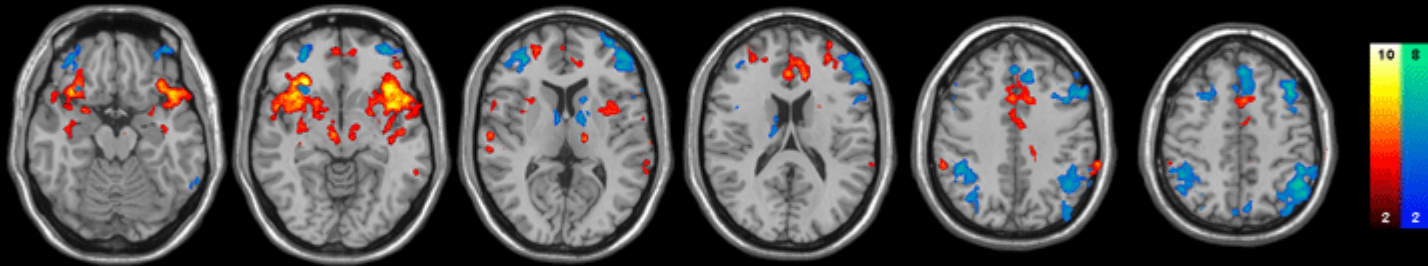

Functional  
Correlations

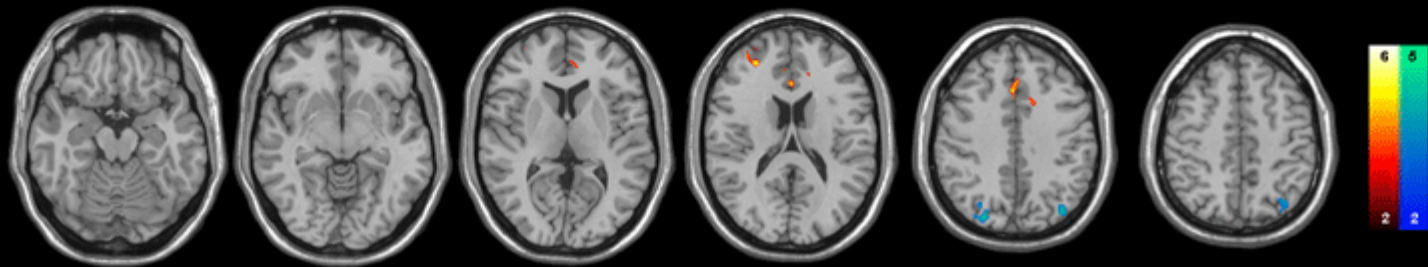

Type of file: figure

Label: supp fig 3

Filename: Supp\_Fig3.gif

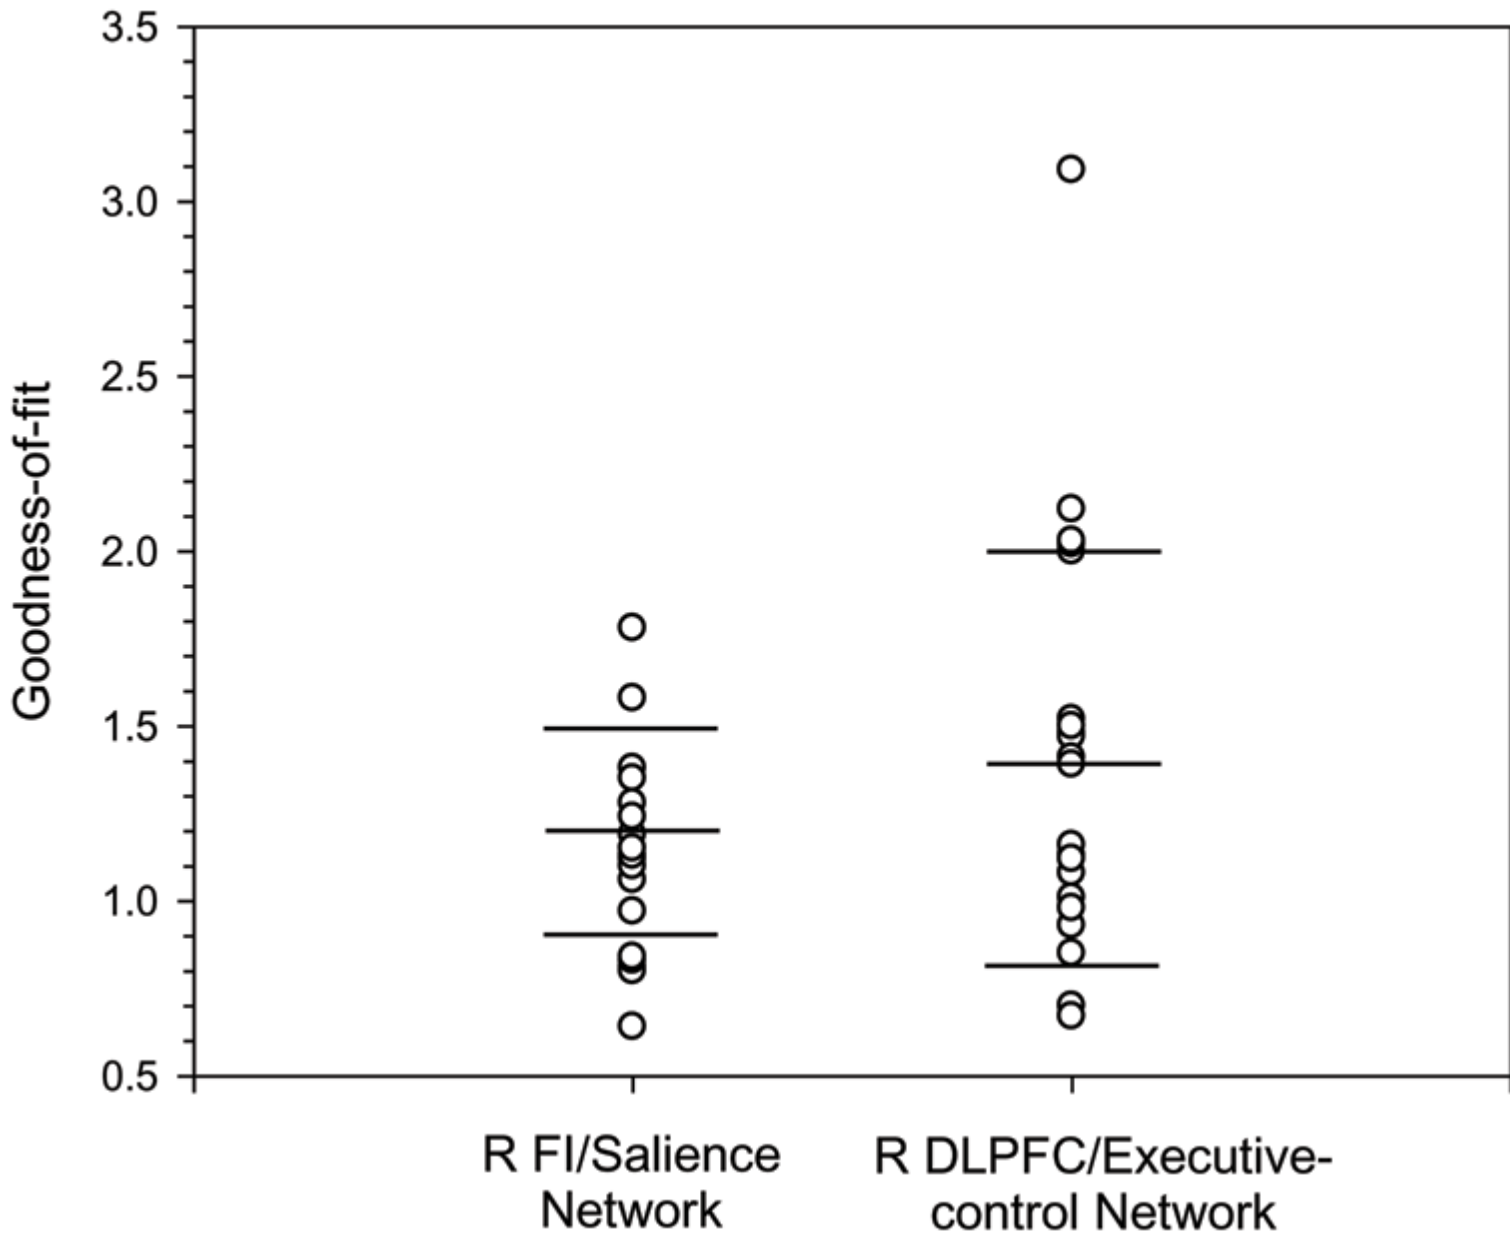

Type of file: figure

Label: supp fig 4

Filename: Supp\_Fig4.gif

### Subject 13

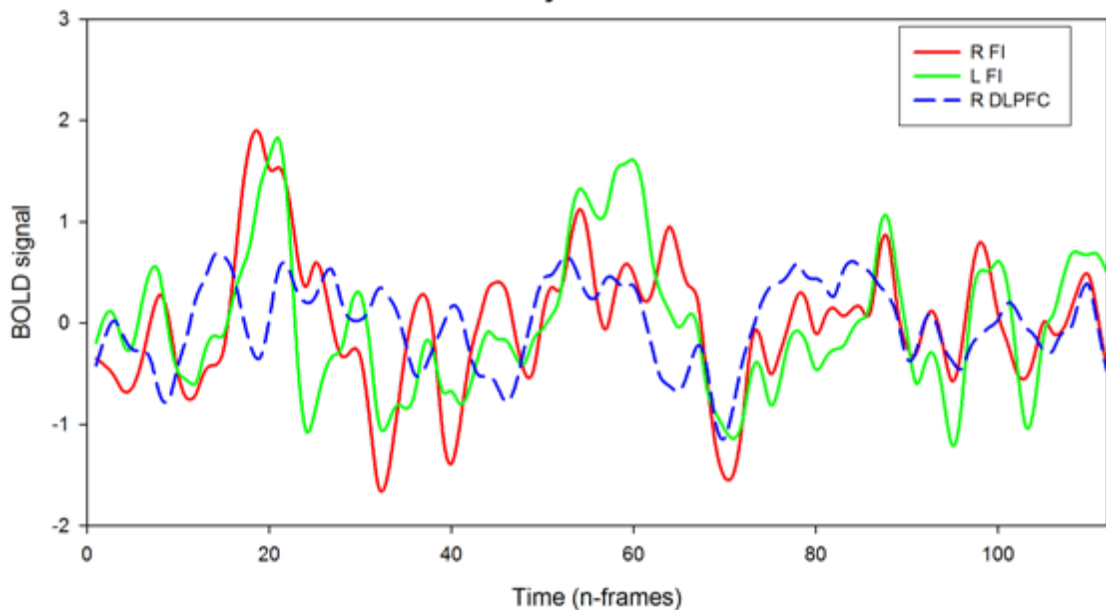

### Subject 14

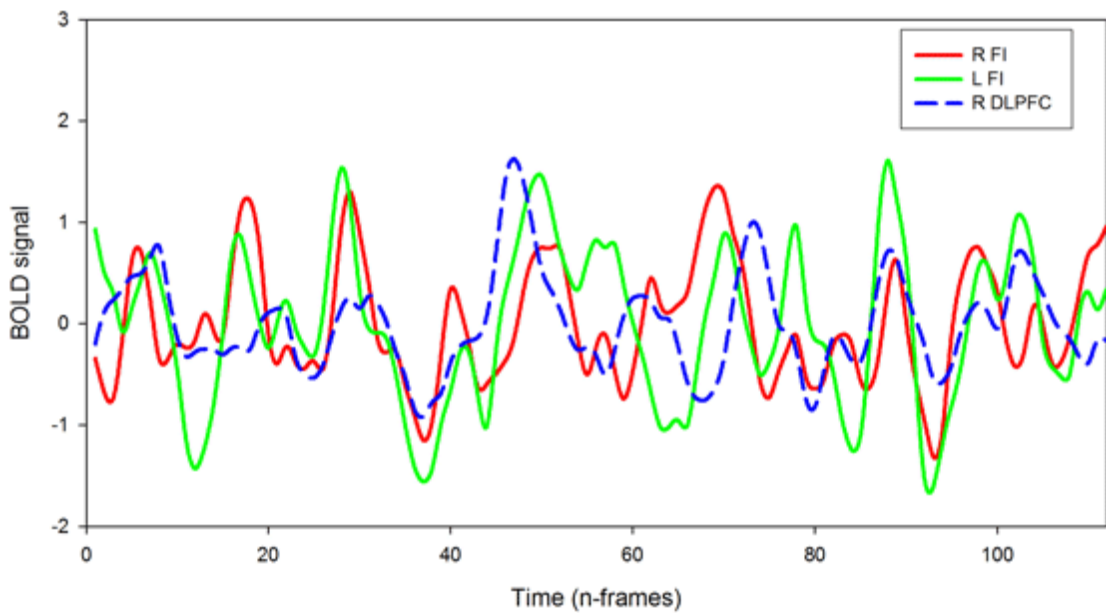

Supplement: NIHMS74937-supplement-01.pdf [file NIHMS74937-supplement-01.pdf]
